# Supplementary material for: Study of Neuronal Apoptosis ceRNA Network in Hippocampal Sclerosis of Human Temporal Lobe Epilepsy by RNA-Seq
Source: PubMed Central journal article supplement (PMC8633546; doi:10.3389/fnins.2021.770627), 2021-11-12
Supplement: Data_Sheet_1.pdf [file Data_Sheet_1.pdf]

## Supplementary Appendix

**Supplementary Table S1. Clinical data of HS-TLE and nonHS-TLE patients**

| Group     | Patient | Gender | Age at First seizure (year) | Duration of epilepsy(year) | seizure type | seizure frequency (times/month) | Seizure duration (seconds) | Side of Hippocampus | Age at surgery (years) | AEDs              | ILAE classification | RNA-Seq |
|-----------|---------|--------|-----------------------------|----------------------------|--------------|---------------------------------|----------------------------|---------------------|------------------------|-------------------|---------------------|---------|
| TLE-HS    | 1       | M      | 9                           | 15                         | GAS          | 2~10                            | 60~600                     | Left                | 24                     | PHB<br>LEV<br>VPA | ILAE-I              | Yes     |
|           | 2       | M      | 9                           | 20                         | GAS          | 3~4                             | 60~120                     | Left                | 29                     | CBZ<br>LTG<br>VPA |                     |         |
|           | 3       | F      | 4                           | 25                         | CTCS         | 3~9                             | 180~600                    | Left                | 29                     | LEV<br>TPM<br>VPA |                     |         |
|           | 4       | M      | 7                           | 8                          | GSA          | 10~90                           | 5~60                       | Left                | 15                     | OXC<br>LTG<br>LEV |                     |         |
|           | 5       | F      | 18                          | 3                          | GS           | irregular                       | 3~600                      | Right               | 21                     | CBZ<br>VPA<br>OXC |                     |         |
|           | 6       | F      | 8                           | 4                          | GS           | irregular                       | 4~10                       | Right               | 12                     | LEV<br>LTG<br>PHB |                     |         |
|           | 7       | F      | 13                          | 14                         | PZ or + GSA  | PZ: 8~9; GSA: 2~3               | 2~600                      | Left                | 27                     | CBZ<br>TPM<br>PHB |                     |         |
| TLE-nonHS | 8       | M      | 22                          | 5                          | GTCS         | 3~6                             | 240~420                    | Left                | 27                     | VPA<br>TPM<br>OXC | no-HS               | Yes     |
|           | 9       | M      | 29                          | 2                          | GTCS         | 1~3                             | 60~480                     | Right               | 31                     | VPA<br>LTG<br>PHB |                     |         |
|           | 10      | F      | 27                          | 3                          | GTCS         | irregular                       | 3~60                       | Right               | 30                     | LEV<br>VPA<br>PHB |                     |         |
|           | 11      | M      | 9                           | 10                         | GAS          | 4~10                            | 60~300                     | Right               | 19                     | OXC<br>VPA<br>OXC |                     |         |
|           | 12      | M      | 14                          | 15                         | GS           | 4~7                             | 5~60                       | Left                | 29                     | CBZ<br>CBZ<br>OXC |                     |         |
|           | 13      | F      | 14                          | 10                         | GTCS         | 2~5                             | 60~480                     | Right               | 24                     | LEV<br>OXC<br>LEV |                     |         |
|           | 14      | F      | 20                          | 9                          | GTCS         | 1~7                             | 10~120                     | Right               | 29                     | LEV<br>VPA        |                     |         |

**Abbreviations:** AEDs: antiepileptic drugs, CBZ: carbamazepine, LEV: levetiracetam, LTG: lamotrigine, PHB: phenobarbital, TPM: topiramate, VPA: valproic acid, OXC: oxcarbazepine. PZ: partial seizure, GS: generalized seizures, GAS: generalized absence seizure, GMS: generalized myoclonic seizures, GTCS: generalized tonic clonic seizures, GSA: generalized seizures with atonic.

**Supplementary Table S2. Gene lists in the ceRNA network**

| mRNA                                         | lncRNA                                                                  | miRNA                                                                                             |
|----------------------------------------------|-------------------------------------------------------------------------|---------------------------------------------------------------------------------------------------|
| <b>Apoptotic ceRNA network</b>               |                                                                         |                                                                                                   |
| APPL1                                        | AC104083.1, AL137003.1, HELLPAR                                         | has-miR-454-3p, has-miR-182-5p, has-miR-200c-3p                                                   |
| BCLAF1                                       | AL137003.1, HELLPAR                                                     | has-miR-182-5p, has-miR-30a-5p                                                                    |
| CDKN1A                                       | AC104083.1                                                              | has-miR-454-3p                                                                                    |
| DYRK2                                        | AC104083.1, AC125257.1, CDKN2B-AS1, HELLPAR, MEG3, UBA6-AS1             | has-miR-195-5p, has-miR-454-3p, has-miR-302b-3p, has-miR-302d-3p, has-miR-155-5p, has-miR-200c-3p |
| FNIP2                                        | AC011447.7, AC104083.1, AC125257.1, CDKN2B-AS1, HELLPAR, MEG3, UBA6-AS1 | has-miR-206, has-miR-195-5p, has-miR-302b-3p, has-miR-302d-3p, has-miR-30a-5p                     |
| INHBA                                        | HELLPAR                                                                 | has-miR-200c-3p                                                                                   |
| MAPK8                                        | AC104083.1, CDKN2B-AS1, HELLPAR, MEG3, UBA6-AS1                         | has-miR-195-5p                                                                                    |
| PPP3R1                                       | AC125257.1, AL137003.1, CDKN2B-AS1, HELLPAR                             | has-miR-302b-3p, has-miR-302d-3p, has-miR-182-5p, has-miR-200c-3p, has-miR-30a-5p                 |
| SCN2A                                        | AC125257.1, CDKN2B-AS1, HELLPAR                                         | has-miR-302b-3p, has-miR-302d-3p, has-miR-155-5p, has-miR-30a-5p                                  |
| SH3RF1                                       | AC011447.7, HELLPAR                                                     | has-miR-1-3p, has-miR-206, has-miR-30a-5p                                                         |
| YWHAB                                        | AC104083.1, HELLPAR                                                     | has-miR-454-3p, has-miR-200c-3p                                                                   |
| <b>Epilepsy ceRNA network</b>                |                                                                         |                                                                                                   |
| ABAT                                         | AC015813.1, AC125257.1, HELLPAR                                         | hsa-miR-135a-5p, hsa-miR-660-5p, hsa-miR-155-5p, hsa-miR-200c-3p                                  |
| ARC                                          | AC015813.1, AC125257.1                                                  | hsa-miR-135a-5p                                                                                   |
| DYRK2                                        | AC104083.1, AC125257.1, CDKN2B-AS1, HELLPAR, MEG3, UBA6-AS1             | hsa-miR-195-5p, hsa-miR-454-3p, hsa-miR-302b-3p, hsa-miR-302d-3p, hsa-miR-155-5p, hsa-miR-200c-3p |
| GRIN2A                                       | HELLPAR                                                                 | hsa-miR-30a-5p                                                                                    |
| KCNJ3                                        | AC011447.7, AC015813.1, HELLPAR, UBA6-AS1                               | hsa-miR-374a-3p, hsa-miR-30a-5p                                                                   |
| MAPK8                                        | AC104083.1, CDKN2B-AS1, HELLPAR, MEG3, UBA6-AS1                         | hsa-miR-195-5p                                                                                    |
| NCL                                          | AC011447.7                                                              | hsa-miR-1-3p, hsa-miR-206                                                                         |
| PIGS                                         | AC011447.7, AC104083.1, CDKN2B-AS1, LINC00944                           | hsa-miR-199b-5p, hsa-miR-454-3p                                                                   |
| PIK3C2A                                      | AC011447.7, AC015813.1, AC104083.1, AC125257.1                          | hsa-miR-1-3p, hsa-miR-206, hsa-miR-135a-5p, hsa-miR-454-3p                                        |
| PLCB1                                        | AC015813.1, AC104083.1, AC125257.1, HELLPAR                             | hsa-miR-135a-5p, hsa-miR-454-3p, hsa-miR-155-5p                                                   |
| PPP3CA                                       | AL137003.1, HELLPAR                                                     | hsa-miR-182-5p, hsa-miR-30a-5p                                                                    |
| PRICKLE2                                     | AC011447.7, AC015813.1, AC104083.1, AL137003.1, HELLPAR, UBA6-AS1       | hsa-miR-374a-3p, hsa-miR-454-3p, hsa-miR-182-5p                                                   |
| SCN2A                                        | AC125257.1, CDKN2B-AS1, HELLPAR                                         | hsa-miR-302b-3p, hsa-miR-302d-3p, hsa-miR-155-5p, hsa-miR-30a-5p                                  |
| SEMA3C                                       | AC125257.1, CDKN2B-AS1, HELLPAR                                         | hsa-miR-302b-3p, hsa-miR-302d-3p                                                                  |
| SLC12A5                                      | AC104083.1                                                              | hsa-miR-454-3p                                                                                    |
| SYNJ1                                        | AC011447.7, AC104083.1, CDKN2B-AS1, HELLPAR, MEG3, UBA6-AS1             | hsa-miR-1-3p, hsa-miR-206, hsa-miR-195-5p, hsa-miR-454-3p, hsa-miR-200c-3p                        |
| <b>Core neuronal apoptosis ceRNA network</b> |                                                                         |                                                                                                   |
| DYRK2                                        | AC104083.1, AC125257.1, CDKN2B-AS1, HELLPAR, MEG3, UBA6-AS1             | has-miR-195-5p, has-miR-454-3p, has-miR-302b-3p, has-miR-302d-3p, has-miR-155-5p, has-miR-200c-3p |
| MAPK8                                        | AC104083.1, CDKN2B-AS1, HELLPAR, MEG3, UBA6-AS1                         | has-miR-195-5p                                                                                    |
| SCN2A                                        | AC125257.1, CDKN2B-AS1, HELLPAR                                         | has-miR-302b-3p, has-miR-302d-3p, has-miR-155-5p, has-miR-30a-5p                                  |

**Supplementary Table S3. Primers of qRT-PCR**

| Type            | Gene            | Strand | Sequence                                   |
|-----------------|-----------------|--------|--------------------------------------------|
| miRNA           | hsa-miR-195-5p  | F      | TAGCAGCACAGAAACAT                          |
|                 | hsa-miR-155-5p  | F      | AATGCTAATCGTGATAGGGGT                      |
|                 | hsa-miR-200c-3p | F      | TAATACTGCCTGGTAATGATG                      |
| mRNA            | DYRK2           | F      | GCTCCACCACCAAAGATCCC                       |
|                 |                 | R      | GCACCTAAAGGAGAGGGCTG                       |
|                 | MAPK8           | F      | CGCCGTTTCGTCAGCTTCA                        |
|                 |                 | R      | TACTGCCGCCAATCGTGT                         |
|                 | SCN2A           | F      | TCTTCTTGGTGCCAGCTTATCA                     |
|                 |                 | R      | GTGCCATCTTTTCATCCTGCT                      |
| lncRNA          | CDKN2B-AS1      | F      | TCTGACGCGACATCTGGAC                        |
|                 |                 | R      | AAAAGGGACACTAGTCCGGC                       |
|                 | MEG3            | F      | GCTTAGTTCCTGGCACTCTGA                      |
|                 |                 | R      | AGCTCATTAGCACGGTAACCA                      |
|                 | UBA6-AS1        | F      | TGCTCTACAGCCAAACATGC                       |
|                 |                 | R      | CTGAAAGGCTTTGGGACTTTGA                     |
| Inner Reference |                 |        |                                            |
| mRNA            | GAPDH           | F      | GTCTCCTCTGACTTCAACAGCG                     |
| lncRNA          |                 | R      | ACCACCCTGTTGCTGTAGCCAA                     |
| miRNA           | RNU6b           | F      | TTCGTGAAGCGTTCATATTTTTTCGTGAAGCGTTCATATTTT |

### Supplementary Figure S1. Immunohistochemical NeuN staining of hippocampal neurons

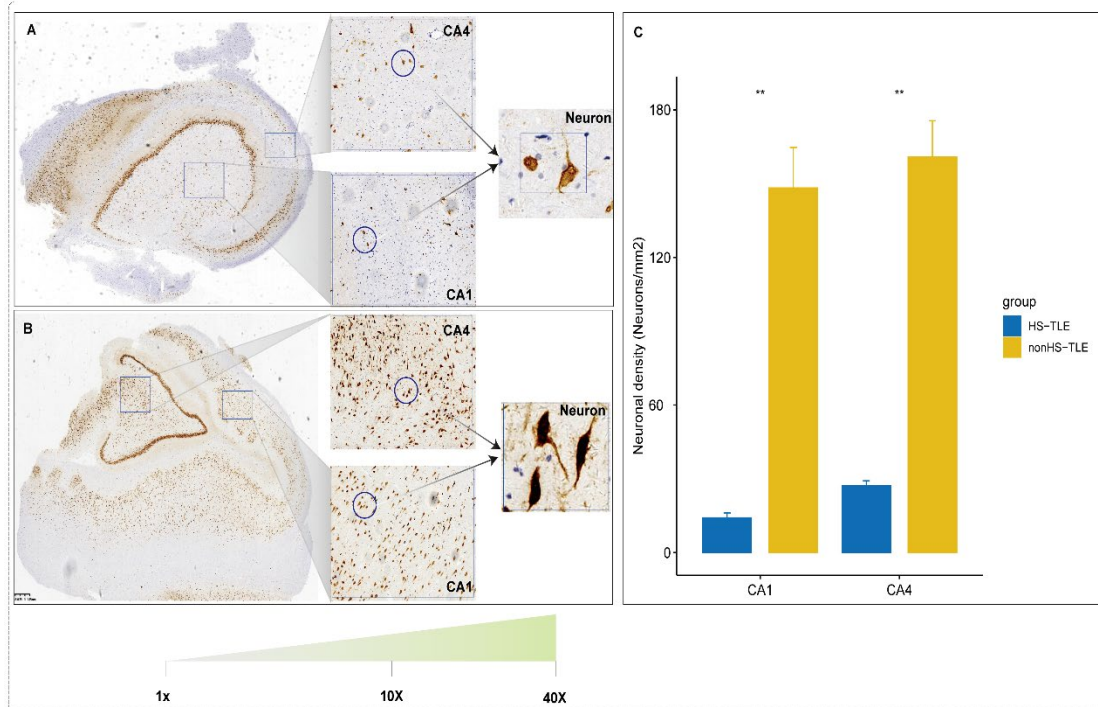

Immunohistochemical NeuN staining of HS-TLE and nonHS-TLE group. A. Low-magnification view ( $\times 1$ ) of the HS-TLE group showing the neuronal loss in the CA4 and CA1 regions; High-magnification view ( $\times 10$ ) of the HS-TLE group in CA4 and CA1; B. Low-magnification view ( $\times 1$ ) of the nonHS-TLE group showing no neuronal loss in the CA4 and CA1; High-magnification view ( $\times 10$ ) of the no-HS group in CA4 and CA1. C. Comparison of neuronal density between the HS-TLE and nonHS-TLE groups (\*\*  $p \leq 0.01$ ).
